# Supplementary material for: Air Pollution and Deaths among Elderly Residents of São Paulo, Brazil: An Analysis of Mortality Displacement
Source: PubMed Central journal article supplement (PMC5332200; doi:10.1289/ehp98), 2016-10-07
Supplement: EHP98.s001.acco.pdf [file EHP98.s001.acco.pdf]

**Note to readers with disabilities:** *EHP* strives to ensure that all journal content is accessible to all readers. However, some figures and Supplemental Material published in *EHP* articles may not conform to [508 standards](#) due to the complexity of the information being presented. If you need assistance accessing journal content, please contact [ehponline@niehs.nih.gov](mailto:ehponline@niehs.nih.gov). Our staff will work with you to assess and meet your accessibility needs within 3 working days.

## **Supplemental Material**

### **Air Pollution and Deaths among Elderly Residents of São Paulo, Brazil: An Analysis of Mortality Displacement**

Amine Farias Costa, Gerard Hoek, Bert Brunekreef, and Antônio CM Ponce de Leon

**Table S1.** Spearman correlations of PM<sub>10</sub>, CO and NO<sub>2</sub> concentrations among monitoring sites.

**Table S2.** Percent of missing data of PM<sub>10</sub>, CO and NO<sub>2</sub> among monitoring sites

**Table S3.** Details of models adjustment for trend, seasonality, temperature and relative humidity

**Table S4.** Cumulative percent change (95% confidence interval) in number of deaths associated with PM<sub>10</sub> levels for different cumulative lag structures. Temporal trend sensitivity analysis

**Table S5.** Cumulative percent change (95% confidence interval) in number of deaths (all ages) associated with PM<sub>10</sub> levels for different cumulative lag structures

**Table S6.** Cumulative percent change (95% confidence interval) in number of deaths associated with PM<sub>10</sub> levels for different cumulative lag structures, adjusted by mean temperature until lag 10

**Table S7.** Comparison of single lag percent change (95% confidence interval) in number of total, circulatory, respiratory and cancer deaths among studies

**Table S8.** Comparison of cumulative percent change (95% confidence interval) by shorter lag structures in number of total, circulatory and respiratory deaths by 10 µg/m<sup>3</sup> increase in particulate air pollution among studies

**Figure S1.** Single lag percent change<sup>a</sup> in number of deaths associated with air pollutant levels of lags 0-30 days<sup>b</sup>. <sup>a</sup>Associated with a 10  $\mu\text{g}/\text{m}^3$  increase in PM10 and NO<sub>2</sub> and with a 1 ppm increase in CO. <sup>b</sup>Results from a Poisson generalized additive distributed lag model, constrained with a second degree polynomial, using single-day lag structures of lags 0-30 days for PM10, NO<sub>2</sub> and CO, adjusted by trend, seasonality, temperature, relative humidity, weekdays and holidays. The shadow area represents 95% CI.

## References

**Table S1.** Spearman correlations of PM10, CO and NO<sub>2</sub> concentrations<sup>a</sup> among monitoring sites.

| Sites               | Cerqueira César | Ibirapuera | Parque Dom Pedro II |
|---------------------|-----------------|------------|---------------------|
| PM10                |                 |            |                     |
| Cerqueira César     | 1.00            |            |                     |
| Ibirapuera          | 0.90            | 1.00       |                     |
| Parque Dom Pedro II | 0.90            | 0.90       | 1.00                |
| CO                  |                 |            |                     |
| Cerqueira César     | 1.00            |            |                     |
| Ibirapuera          | 0.82            | 1.00       |                     |
| Parque Dom Pedro II | 0.84            | 0.80       | 1.00                |
| NO <sub>2</sub>     |                 |            |                     |
| Cerqueira César     | 1.00            |            | -                   |
| Ibirapuera          | 0.80            | 1.00       | -                   |

<sup>a</sup>24-hour average for PM10 and NO<sub>2</sub>, 8-hour maximum for CO.

**Table S2.** Percent of missing data of PM10, CO, NO<sub>2</sub> and O<sub>3</sub> among monitoring sites, before and after imputation methods.

| Sites               | Percent of missing data |                          |                           |
|---------------------|-------------------------|--------------------------|---------------------------|
|                     | Original data           | After linear regressions | After <i>mtsdi</i> method |
| PM10                |                         |                          |                           |
| Cerqueira César     | 10.6                    | 0.43                     | 0                         |
| Ibirapuera          | 5.5                     | 1.12                     | 0                         |
| Parque Dom Pedro II | 18.1                    | 0.43                     | 0                         |
| CO                  |                         |                          |                           |
| Cerqueira César     | 3.2                     | 0.23                     | 0                         |
| Ibirapuera          | 6.3                     | 0.23                     | 0                         |
| Parque Dom Pedro II | 19.1                    | 0.34                     | 0                         |
| NO <sub>2</sub>     |                         |                          |                           |
| Cerqueira César     | 23.8                    | 1.60                     | 0                         |
| Ibirapuera          | 16.2                    | 5.23                     | 0                         |

**Table S3.** Details of models adjustment for trend, seasonality, temperature and relative humidity.

| Deaths              | Variables                    |                                                              |                                   |    |                                               |    |
|---------------------|------------------------------|--------------------------------------------------------------|-----------------------------------|----|-----------------------------------------------|----|
|                     | Trend and seasonality        |                                                              | Temperature –<br>Mean temperature |    | Relative humidity –<br>Mean relative humidity |    |
|                     | Spline                       | df/year<br>(df after model fit)                              | Lag                               | df | Lag                                           | df |
| Non-accidental      | penalized                    | PM10: 6 (71.4)<br>NO <sub>2</sub> : 6 (71.4)<br>CO: 6 (71.7) | 3                                 | 3  | 3                                             | 2  |
| Circulatory         | penalized and<br>unpenalized | PM10: 6 (70.8)<br>NO <sub>2</sub> : 6 (72)<br>CO: 6 (72)     | 5                                 | 3  | 3                                             | 3  |
| Cerebrovascular     | unpenalized                  | 4 (48)                                                       | 5                                 | 3  | 3                                             | 3  |
| Respiratory         | unpenalized                  | 5 (61)                                                       | 3                                 | 3  | 3                                             | 2  |
| Chronic respiratory | unpenalized                  | 5 (61)                                                       | 3                                 | 3  | 3                                             | 2  |
| Cancer              | unpenalized                  | 4 (48)                                                       | 5                                 | 2  | 3                                             | 2  |

**Table S4.** Cumulative percent change (95% confidence interval)<sup>a</sup> in number of deaths associated with PM10 levels for different cumulative lag structures<sup>b</sup>. Temporal trend sensitivity analysis.

| Deaths (df/year)        | Percent Change (95% CI) |                     |                      |
|-------------------------|-------------------------|---------------------|----------------------|
|                         | Lag 0 to 10             | Lag 0 to 20         | Lag 0 to 30          |
| Non-accidental (4)      | 0.91 (0.54, 1.28)       | 0.18 (-0.33, 0.69)  | -0.59 (-1.25, 0.07)  |
| Circulatory (5)         | 0.65 (0.06, 1.24)       | -0.25 (-1.07, 0.57) | -1.09 (-2.15, -0.02) |
| Cerebrovascular (5)     | 2.30 (1.08, 3.54)       | 0.99 (-0.71, 2.72)  | 0.59 (-1.63, 2.87)   |
| Respiratory (6)         | 3.24 (2.24, 4.26)       | 2.97 (1.53, 4.43)   | 2.76 (0.83, 4.72)    |
| Chronic Respiratory (6) | 3.07 (1.37, 4.80)       | 1.84 (-0.59, 4.32)  | 2.38 (-0.88, 5.74)   |
| Cancer (5)              | 1.62 (0.75, 2.50)       | 1.72 (0.50, 2.96)   | 2.20 (0.58, 3.84)    |

<sup>a</sup>Associated with a 10 µg/m<sup>3</sup> increase in PM10. <sup>b</sup>Results from a Poisson generalized additive distributed lag model, constrained with a second degree polynomial, using cumulative lag structures of lags 0-10, 0-20 and 0-30 days for PM10, NO<sub>2</sub> and CO, adjusted by trend, seasonality, temperature, relative humidity, weekdays and holidays.

**Table S5.** Cumulative percent change (95% confidence interval)<sup>a</sup> in number of deaths (all ages) associated with PM10 levels for different cumulative lag structures<sup>b</sup>.

| Deaths              | Percent Change (95% CI) |                      |                     |
|---------------------|-------------------------|----------------------|---------------------|
|                     | Lag 0 to 10             | Lag 0 to 20          | Lag 0 to 30         |
| Non-accidental      | 1.07 (0.75, 1.39)       | 0.27 (-0.18, 0.72)   | 0.09 (-0.50, 0.69)  |
| Circulatory         | 0.08 (-0.45, 0.61)      | -1.12 (-1.86, -0.38) | -1.47 (-2.43, 0.50) |
| Cerebrovascular     | 1.75 (0.72, 2.79)       | 0.50 (-0.92, 1.93)   | 0.12 (-1.70, 1.98)  |
| Respiratory         | 3.07 (2.21, 3.94)       | 3.07 (1.85, 4.31)    | 2.97 (1.35, 4.62)   |
| Chronic Respiratory | 2.87 (1.36, 4.41)       | 1.97 (-0.15, 4.14)   | 2.34 (-0.49, 5.25)  |
| Cancer              | 1.48 (0.78, 2.18)       | 1.33 (0.37, 2.30)    | 1.90 (0.65, 3.16)   |

<sup>a</sup>Associated with a 10  $\mu\text{g}/\text{m}^3$  increase in PM10. <sup>b</sup>Results from a Poisson generalized additive distributed lag model, constrained with a second degree polynomial, using cumulative lag structures of lags 0-10, 0-20 and 0-30 days for PM10, NO<sub>2</sub> and CO, adjusted by trend, seasonality, temperature, relative humidity, weekdays and holidays.

**Table S6.** Cumulative percent change (95% confidence interval)<sup>a</sup> in number of deaths associated with PM10 levels for different cumulative lag structures, adjusted by mean temperature until lag 10<sup>b</sup>.

| Deaths              | Percent Change (95% CI) |                    |                     |
|---------------------|-------------------------|--------------------|---------------------|
|                     | Lag 0 to 10             | Lag 0 to 20        | Lag 0 to 30         |
| Non-accidental      | 1.28 (0.81, 1.75)       | 1.07 (0.42, 1.73)  | 0.49 (-0.34, 1.35)  |
| Circulatory         | 1.04 (0.31, 1.78)       | 0.50 (-0.53, 1.53) | -0.45 (-1.75, 0.87) |
| Cerebrovascular     | 1.38 (0.03, 2.75)       | 0.33 (-1.50, 2.19) | -0.23 (-2.53, 2.12) |
| Respiratory         | 1.99 (0.86, 3.12)       | 2.05 (0.49, 3.63)  | 1.70 (-0.28, 3.73)  |
| Chronic Respiratory | 1.73 (-0.17, 3.66)      | 0.77 (-1.83, 3.44) | 1.22 (-2.12, 4.68)  |
| Cancer              | 1.01 (0.13, 1.89)       | 1.37 (0.21, 2.61)  | 1.69 (0.22, 3.20)   |

<sup>a</sup>Associated with a 10  $\mu\text{g}/\text{m}^3$  increase in PM10. <sup>b</sup>Results from a Poisson generalized additive distributed lag model, constrained with a second degree polynomial, using cumulative lag structures of lags 0-10, 0-20 and 0-30 days for PM10, NO<sub>2</sub> and CO, adjusted by trend, seasonality, temperature (cumulative lag structures of lags 0-10 days with exposure-response and lag-response curves according to Gasparrini et al. (2015)), relative humidity, weekdays and holidays.

**Table S7.** Comparison of single lag<sup>a</sup> percent change (95% confidence interval)<sup>b</sup> in number of total, circulatory, respiratory and cancer deaths<sup>c</sup> among studies.

| Deaths                    | Percent change (95% CI) |                   |                    |
|---------------------------|-------------------------|-------------------|--------------------|
|                           | PM10                    | NO2               | CO                 |
| <b>Non-accidental</b>     |                         |                   |                    |
| São Paulo (this study)    | 0.54 (0.36,0.72)        | 0.58 (0.38, 0.79) | 1.07 (0.68, 1.47)  |
| ESCALA                    |                         |                   |                    |
| (Romieu et al. 2012)      |                         |                   |                    |
| São Paulo                 | 0.49 (0.30, 0.70)       | NA                | NA                 |
| Rio de Janeiro            | 0.57 (0.20, 0.90)       | NA                | NA                 |
| Meta-analysis             | 0.47 (0.35, 0.58)       | 0.86 (0.50, 1.22) | 1.56 (-0.37, 3.52) |
| (Anderson et al. 2007)    |                         |                   |                    |
| APHEA (Aga et al. 2003;   | 0.74 (0.52, 0.95)       | 0.30 (0.22, 0.38) | 1.20 (0.63, 1.77)  |
| Samoli et al. 2006, 2007) |                         |                   |                    |
| APHENA                    |                         |                   |                    |
| (Katsouyanni et al. 2009) |                         |                   |                    |
| Canada                    | 1.10 (0.64, 1.60)       | NA                | NA                 |
| USA                       | 0.62 (0.39, 0.86)       | NA                | NA                 |
| Europe                    | 0.45 (0.29, 0.61)       | NA                | NA                 |
| PAPA (Wong et al. 2008)   | 0.55 (0.26, 0.85)       | 1.23 (0.84,1.62)  | NA                 |
| Meta-analysis             | NA                      | 0.71 (0.43, 1.00) | NA                 |
| (Mills et al. 2015)       |                         |                   |                    |
| <b>Circulatory</b>        |                         |                   |                    |
| São Paulo (this study)    | 0.40 (0.07, 0.73)       | 0.42 (0.11, 0.74) | 0.84 (0.23, 1.45)  |
| ESCALA                    |                         |                   |                    |
| (Romieu et al. 2012)      |                         |                   |                    |
| São Paulo                 | 0.46 (0.00, 1.00)       | NA                | NA                 |
| Rio de Janeiro            | 1.09 (0.40, 2.00)       | NA                | NA                 |
| Meta-analysis             | 0.50 (0.31, 0.69)       | 0.34 (0.19, 0.48) | 1.11 (0.48, 1.74)  |
| (Anderson et al. 2007)    |                         |                   |                    |
| APHEA (Samoli et al.      | 0.69 (0.31, 1.08)       | 0.40 (0.29, 0.52) | 0.81 (0.36; 1.26)  |
| 2006, 2007; Zanobetti et  |                         |                   |                    |
| al. 2003)                 |                         |                   |                    |
| APHENA                    |                         |                   |                    |
| (Katsouyanni et al. 2009) |                         |                   |                    |
| Canada                    | 1.80 (0.75, 2.80)       | NA                | NA                 |
| USA                       | 1.01 (0.60, 1.42)       | NA                | NA                 |
| Europe                    | 0.74 (0.45, 1.03)       | NA                | NA                 |
| PAPA (Wong et al. 2008)   | 0.58 (0.22, 0.93)       | 1.36 (0.89,1.82)  | NA                 |
| Meta-analysis             | NA                      | 0.88 (0.63, 1.13) | NA                 |
| (Mills et al. 2015)       |                         |                   |                    |

Table S7 (continued)

|                                                         |                     |                   |                    |
|---------------------------------------------------------|---------------------|-------------------|--------------------|
| <b>Respiratory</b>                                      |                     |                   |                    |
| São Paulo (this study)                                  | 0.98 (0.41, 1.56)   | 0.67 (0.10, 1.24) | 2.54 (1.47, 3.63)  |
| ESCALA                                                  |                     |                   |                    |
| (Romieu et al. 2012)                                    |                     |                   |                    |
| São Paulo                                               | 0.80 (0.10, 1.60)   | NA                | NA                 |
| Rio de Janeiro                                          | 1.50 (0.00, 2.70)   | NA                | NA                 |
| Meta-analysis (Anderson et al. 2007)                    | 1.33 (0.75, 1.91)   | 0.45 (0.21, 0.69) | 2.65 (1.27,4.05)   |
| APHEA (Samoli et al. 2006, 2007; Zanobetti et al. 2003) | 0.74 (-0.17, 1.66)  | 0.38 (0.17, 0.58) | NA                 |
| APHENA                                                  |                     |                   |                    |
| (Katsouyanni et al. 2009)                               |                     |                   |                    |
| Canada                                                  | -0.36 (-2.00, 1.30) | NA                | NA                 |
| USA                                                     | 1.34 (0.73, 1.96)   | NA                | NA                 |
| Europe                                                  | 0.62 (0.28, 0.96)   | NA                | NA                 |
| PAPA (Wong et al. 2008)                                 | 0.62 (0.22, 1.02)   | 1.48 (0.68, 2.28) | NA                 |
| Meta-analysis (Mills et al. 2015)                       | NA                  | 1.09 (0.75, 1.42) | NA                 |
| <b>Cerebrovascular</b>                                  |                     |                   |                    |
| São Paulo (this study)                                  | 1.44 (0.74, 2.15)   | 1.32 (0.63, 2.02) | 2.39 (1.08, 3.71)  |
| ESCALA                                                  |                     |                   |                    |
| (Romieu et al. 2012)                                    |                     |                   |                    |
| São Paulo                                               | 0.56 (-0.30, 1.40)  | NA                | NA                 |
| Rio de Janeiro                                          | 1.43 (0.10, 2.80)   | NA                | NA                 |
| Meta-analysis (Anderson et al. 2007)                    | 0.55 (0.15,0.95)    | 0.94 (0.34,1.55)  | 3.90 (1.72,6.13)   |
| Meta-analysis (Mills et al. 2015)                       | NA                  | 1.35 (0.74, 1.97) | NA                 |
| Meta-analysis (Shah et al. 2015)                        | 0.30 (0.20, 0.40)   | 1.60 (0.70, 2.30) | 5.40 (0.10, 10.80) |
| <b>Chronic Respiratory</b>                              |                     |                   |                    |
| São Paulo (this study)                                  | 0.56 (-0.29, 1.41)  | 1.21 (0.34, 2.08) | 2.19 (0.41, 4.01)  |
| ESCALA                                                  |                     |                   |                    |
| (Romieu et al. 2012)                                    |                     |                   |                    |
| São Paulo                                               | 0.52 (-0.50, 1.50)  | NA                | NA                 |
| Rio de Janeiro                                          | 0.47 (-1.70, 2.50)  | NA                | NA                 |
| Meta-analysis (Anderson et al. 2007)                    | 0.53 (-0.22,1.28)   | 1.92 (1.07,2.78)  | 5.36 (2.64,8.16)   |
| Meta-analysis (Mills et al. 2015)                       | NA                  | 1.11 (0.72, 1.50) | NA                 |
| Meta-analysis (Shah et al. 2015)                        | 2.00 (1.00, 3.00)   | NA                | NA                 |

Table S7 (continued)

| <b>Cancer</b>                         |                    |                    |                     |
|---------------------------------------|--------------------|--------------------|---------------------|
| São Paulo (this study)                | 0.71 (0.27, 1.15)  | 0.93 (0.48, 1.38)  | 0.16 (-0.83, 1.16)  |
| Vancouver<br>(Villeneuve et al. 2003) | 2.30 (-4.60, 9.60) | 3.50 (-2.30, 9.70) | -1.60 (-5.60, 2.40) |
| Montreal<br>(Goldberg et al. 2013)    | NA                 | 1.92 (0.14, 3.74)  | 0.79 (-0.83, 2.43)  |

ESCALA: Estudio de Salud y Contaminación del Aire en Latinoamérica. APHEA: Air Pollution and Health: a European Approach. APHENA: Air Pollution and Health: A European and North American Approach. PAPA: Public Health and Air Pollution in Asia. NA: not available.

<sup>a</sup>Lag 0, 1, 2 or mean of lags 0 and 1. <sup>b</sup>Associated with an interquartile range in Villeneuve et al. (2003) and with a 10 µg/m<sup>3</sup> increase in PM10 and NO<sub>2</sub> and with a 1 ppm increase in CO for other studies. <sup>c</sup>Elderly deaths whenever possible.



**Table S8.** Comparison of cumulative percent change (95% confidence interval) by shorter lag structures in number of total, circulatory and respiratory deaths by 10  $\mu\text{g}/\text{m}^3$  increase in particulate air pollution among studies.

| <b>Deaths</b>                                        | <b>Age group</b> | <b>Air pollutant</b> | <b>Period</b> | <b>Percent change (CI)</b> |
|------------------------------------------------------|------------------|----------------------|---------------|----------------------------|
| <b>Non-accidental</b>                                |                  |                      |               |                            |
| São Paulo <sup>a</sup> (this study)                  | Elderly          | PM10                 | Lag 0 to 3    | 0.85 (0.62, 1.08)          |
| São Paulo (Romieu et al. 2012) <sup>a</sup>          | All ages         | PM10                 | Lag 0 to 3    | 0.79 (0.64, 0.94)          |
| São Paulo <sup>a</sup> (this study)                  | Elderly          | PM10                 | Lag 0 to 5    | 1.08 (0.79, 1.37)          |
| São Paulo (O'Neill et al. 2008) <sup>b</sup>         | Elderly          | PM10                 | Lag 0 to 5    | 1.17 (0.50, 1.85)          |
| 10 USA cities (Schwartz 2000) <sup>a</sup>           | Elderly          | PM2.5                | Lag 0 to 5    | 1.41 (1.16, 1.67)          |
| 12 European cities (Samoli et al. 2013) <sup>a</sup> | All ages         | PM10                 | Lag 0 to 5    | 0.28 (-0.14, 0.71)         |
| <b>Circulatory deaths</b>                            |                  |                      |               |                            |
| São Paulo <sup>a</sup> (this study)                  | Elderly          | PM10                 | Lag 0 to 3    | 0.50 (0.14, 0.85)          |
| São Paulo (Romieu et al. 2012) <sup>a</sup>          | Elderly          | PM10                 | Lag 0 to 3    | 0.81 (0.50, 1.12)          |
| São Paulo <sup>a</sup> (this study)                  | Elderly          | PM10                 | Lag 0 to 5    | 0.64 (0.19, 1.09)          |
| 12 European cities (Samoli et al. 2013) <sup>a</sup> | All ages         | PM10                 | Lag 0 to 5    | 0.54 (0.09, 0.99)          |
| São Paulo <sup>a</sup> (this study)                  | Elderly          | PM10                 | Lag 0 to 6    | 0.68 (0.19, 1.17)          |
| 10 USA cities (Braga et al. 2001) <sup>b</sup>       | All ages         | PM10                 | 7-day effect  | 1.00 (0.60, 1.40)          |
| <b>Respiratory deaths</b>                            |                  |                      |               |                            |
| São Paulo <sup>a</sup> (this study)                  | Elderly          | PM10                 | Lag 0 to 3    | 2.41 (1.84, 2.99)          |
| São Paulo (Romieu et al. 2012) <sup>a</sup>          | Elderly          | PM10                 | Lag 0 to 3    | 1.52 (1.00, 2.03)          |
| São Paulo <sup>a</sup> (this study)                  | Elderly          | PM10                 | Lag 0 to 5    | 3.02 (2.30, 3.75)          |
| 12 European cities (Samoli et al. 2013) <sup>a</sup> | All ages         | PM10                 | Lag 0 to 5    | 1.12 (0.29, 1.95)          |
| <b>Chronic respiratory deaths</b>                    |                  |                      |               |                            |
| São Paulo <sup>a</sup> (this study)                  | Elderly          | PM10                 | Lag 0 to 3    | 2.26 (1.3, 3.24)           |
| São Paulo (Romieu et al. 2012) <sup>a</sup>          | Elderly          | PM10                 | Lag 0 to 3    | 1.81 (0.97, 2.65)          |
| São Paulo <sup>a</sup> (this study)                  | Elderly          | PM10                 | Lag 0 to 6    | 2.96 (1.64, 4.29)          |
| 10 USA cities (Braga et al. 2001) <sup>b</sup>       | All ages         | PM10                 | 7-day effect  | 1.70 (0.10, 3.30)          |

SE: standard error.

<sup>a</sup>Distributed lag model constrained with polynomial structure. <sup>b</sup>Unconstrained distributed lag model.

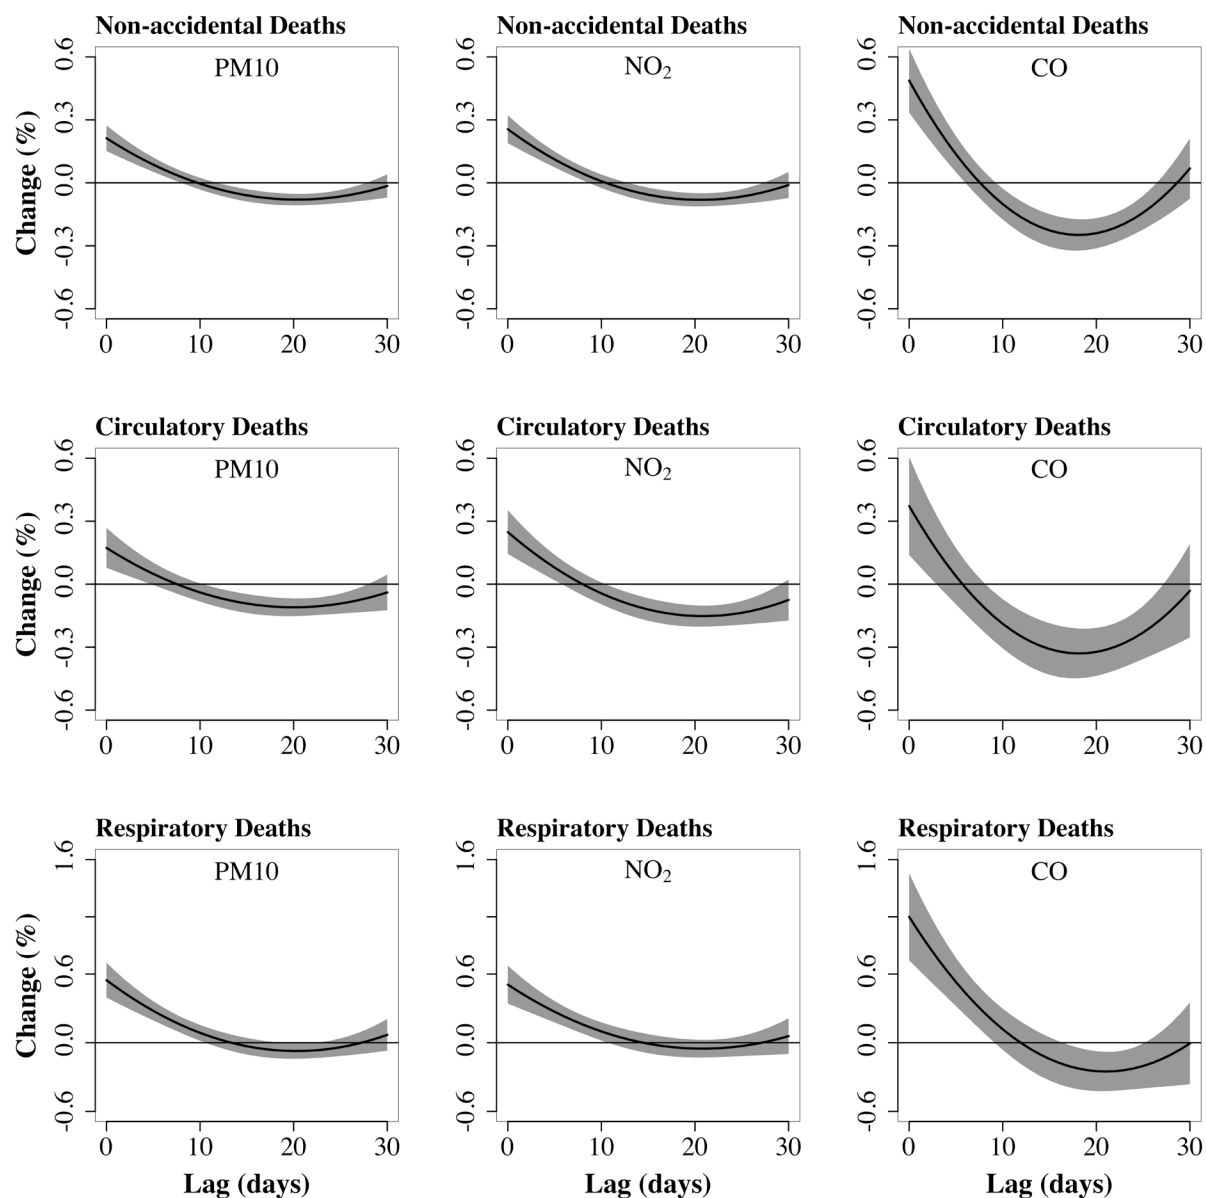

**Figure S1.** Single lag percent change<sup>a</sup> in number of deaths associated with air pollutant levels of lags 0-30 days<sup>b</sup>.

<sup>a</sup>Associated with a 10  $\mu\text{g}/\text{m}^3$  increase in PM10 and NO<sub>2</sub> and with a 1 ppm increase in CO.

<sup>b</sup>Results from a Poisson generalized additive distributed lag model, constrained with a second degree polynomial, using single-day lag structures of lags 0-30 days for PM10, NO<sub>2</sub> and CO, adjusted by trend, seasonality, temperature, relative humidity, weekdays and holidays. The shadow area represents 95% CI.

## References

- Aga E, Samoli E, Touloumi G, Anderson HR, Cadum E, Forsberg B, et al. 2003. Short-term effects of ambient particles on mortality in the elderly: results from 28 cities in the APHEA2 project. *Eur Respir J Suppl* 40:28–33.
- Anderson H, Atkinson R, Bremner S, Carrington J, Peacock J. 2007. Quantitative systematic review of short term associations between ambient air pollution (particulate matter, ozone, nitrogen dioxide, sulphur dioxide and carbon monoxide), and mortality and morbidity. London:Department of Health. Available: <https://www.gov.uk/government/publications/quantitative-systematic-review-of-short-term-associations-between-ambient-air-pollution-particulate-matter-ozone-nitrogen-dioxide-sulphur-dioxide-and-carbon-monoxide-and-mortality-and-morbidity> [accessed 10 June 2015].
- Braga AL, Zanobetti A, Schwartz J. 2001. The lag structure between particulate air pollution and respiratory and cardiovascular deaths in 10 US cities. *J Occup Environ Med* 43: 927–933.
- Gasparriani A, Guo Y, Hashizume M, Lavigne E, Zanobetti A, Schwartz J, et al. 2015. Mortality risk attributable to high and low ambient temperature: a multicountry observational study. *Lancet* 386:369–375; doi:10.1016/S0140-6736(14)62114-0.
- Goldberg MS, Burnett RT, Stieb DM, Brophy JM, Daskalopoulou SS, Valois M-F, et al. 2013. Associations between ambient air pollution and daily mortality among elderly persons in Montreal, Quebec. *Sci Total Environ* 463-464:931–942; doi:10.1016/j.scitotenv.2013.06.095.
- Katsouyanni K, Samet JM, Anderson HR, Atkinson R, Le Tertre A, Medina S, et al. 2009. Air pollution and health: a European and North American approach (APHENA). *Res Rep Health Eff Inst* 142:5–90.
- Mills IC, Atkinson RW, Kang S, Walton H, Anderson HR. 2015. Quantitative systematic review of the associations between short-term exposure to nitrogen dioxide and mortality and hospital admissions. *BMJ Open* 5:e006946; doi:10.1136/bmjopen-2014-006946.
- O’Neill MS, Bell ML, Ranjit N, Cifuentes LA, Loomis D, Gouveia N, et al. 2008. Air pollution and mortality in Latin America: the role of education. *Epidemiology* 19:810–819; doi:10.1097/EDE.0b013e3181816528.
- Romieu I, Gouveia N, Cifuentes LA, de Leon AP, Junger W, Vera J, et al. 2012. Multicity study of air pollution and mortality in Latin America (the ESCALA study). *Res Rep Health Eff Inst*.171:5–86.
- Samoli E, Aga E, Touloumi G, Nisiotis K, Forsberg B, Lefranc A, et al. 2006. Short-term effects of nitrogen dioxide on mortality: an analysis within the APHEA project. *Eur Respir J* 27:1129–1138; doi:10.1183/09031936.06.00143905.
- Samoli E, Stafoggia M, Rodopoulou S, Ostro B, Declercq C, Alessandrini E, et al. 2013. Associations between fine and coarse particles and mortality in Mediterranean cities:

- results from the MED-PARTICLES project. *Environ Health Perspect* 121:932–938; doi:10.1289/ehp.1206124.
- Samoli E, Touloumi G, Schwartz J, Anderson HR, Schindler C, Forsberg B, et al. 2007. Short-term effects of carbon monoxide on mortality: an analysis within the APHEA project. *Environ Health Perspect* 115:1578–1583; doi:10.1289/ehp.10375.
- Schwartz J. 2000. The distributed lag between air pollution and daily deaths. *Epidemiology* 11:320–326.
- Shah ASV, Lee KK, McAllister DA, Hunter A, Nair H, Whiteley W, et al. 2015. Short term exposure to air pollution and stroke: systematic review and meta-analysis. *BMJ* 350:h1295; doi: 10.1136/bmj.h1295.
- Villeneuve PJ, Burnett RT, Shi Y, Krewski D, Goldberg MS, Hertzman C, et al. 2003. A time-series study of air pollution, socioeconomic status, and mortality in Vancouver, Canada. *J Expo Anal Environ Epidemiol* 13:427–435; doi:10.1038/sj.jea.7500292.
- Wong C-M, Vichit-Vadakan N, Kan H, Qian Z. 2008. Public Health and Air Pollution in Asia (PAPA): a multicity study of short-term effects of air pollution on mortality. *Environ Health Perspect* 116:1195–1202; doi:10.1289/ehp.11257.
- Zanobetti A, Schwartz J, Samoli E, Gryparis A, Touloumi G, Peacock J, et al. 2003. The temporal pattern of respiratory and heart disease mortality in response to air pollution. *Environ Health Perspect* 111:1188–1193.
